# Supplementary material for: Senescence protein signatures predict dementia risk with causal implication for TBCA: a two-cohort study
Source: Research Square preprint supplement (doi:10.21203/rs.3.rs-9131525/v1), 2026-03-26
Supplement: Supplementary file 1 [file 10506fce5df541b239af8e43.xlsx]

## Sheet: Content
	Sheet name	Description
	Table B1	List of proteins included in MR (Mendelion Randomization) analysis
	Table B2	Results from MR analyses (Inverse Variance Weighted, Weighted Median, MR-Egger)
	Table B3	Results from leave-one-out MR analysis
	Table B3	F statistics and R-squared for SNPs

## Sheet: Table B1. protein_list
Appendix B1. List of unique protein included in the mendelian randomization analysis1, 2
SeqIDs (aptamer ID)	Uniprot_ID (protein ID)	Uniprot_name (protein name)	SASP score	Inclusion in MR analysis
SeqId_12501_10	O75347	Tubulin-specific chaperone A	midlife SASP score-2	Yes
SeqId_4905_63	Q14019	Coactosin-like protein	midlife SASP score-2	Yes
SeqId_4272_46	P06744	Glucose-6-phosphate isomerase	midlife SASP score-2	Yes
SeqId_3855_56	Q06830	Peroxiredoxin-1	midlife SASP score-2	Yes
SeqId_5508_62	P07339	Cathepsin D	midlife SASP score-2	Yes
SeqId_5722_78	P42785	Lysosomal Pro-X carboxypeptidase	midlife SASP score-2	Yes
SeqId_4192_10	P14550	Aldo-keto reductase family 1 member A1	midlife SASP score-2	Yes
SeqId_13967_14	Q16881	Thioredoxin reductase 1, cytoplasmic	midlife SASP score-2	No
SeqId_14011_17	P31949	Protein S100-A11	midlife SASP score-2	Yes
SeqId_5903_91	P11142	Heat shock cognate 71 kDa protein	midlife SASP score-2	Yes
SeqId_3284_75	P21810	Biglycan	midlife SASP score-2	Yes
SeqId_10612_18	O60568	Multifunctional procollagen lysine hydroxylase and glycosyltransferase LH3	midlife SASP score-2	Yes
SeqId_14157_21	P62258	14-3-3 protein epsilon	midlife SASP score-2, late-life SASP score-2	Yes
SeqId_18901_26	P0DMV9	Heat shock 70 kDa protein 1B	midlife SASP score-2	No
SeqId_4124_24	P0DMV8	Heat shock 70 kDa protein 1A	midlife SASP score-2	No
SeqId_4374_45	Q99988	Growth/differentiation factor 15	midlife SASP score-2, late-life SASP score-2	Yes
SeqId_8469_41	P18065	Insulin-like growth factor-binding protein 2	late-life SASP score-2	Yes
SeqId_15626_223	P98160	Basement membrane-specific heparan sulfate proteoglycan core protein	late-life SASP score-2	Yes
SeqId_15640_54	Q01995	Transgelin	late-life SASP score-2	Yes
SeqId_2609_59	P01034	Cystatin-C	late-life SASP score-2	Yes
Abbrevriations: MR = Mendelion Randomization; SASP = Senescence-Associated Secretory Phenotype
1Inhibin beta A chain had two aptamers (SeqIDs: SeqId_13738_8 and SeqId_19622_7) and both aptamers were included in the MR analysis
2Excluded three proteins (UniProt IDs: Q16881, P0DMV9, P0DMV8) due to unavailability of GWAS data

## Sheet: Table B2. MR_result
Appendix B2. Mendelian randomization results for each SASP Protein (exposure) and dementia (outcome).
Uniprot_name (protein name)	Uniprot_ID (protein ID)	method	N of SNPs	beta	se	OR	95% CI	p-value	Bonferroni-adjusted p-value	p-value from MR Egger (Pleiotropy)
14-3-3 protein epsilon	P62258	Inverse variance weighted	2	-0.06	0.07	0.941765	0.82–0.95	0.392039	0.0230611
Abbreviations: SASP = Senescence-Associated Secretory Phenotype; MR = Mendelian Randomization; b = beta coefficient (effect estimate); SE = standard error; SNP = Single Nucleotide Polymorphism; OR = Odds Ratio; CI = Confidence Interval
Aldo-keto reductase family 1 member A1	P14550	Inverse variance weighted	58	0.02	0.01	1.0202	1.00–1.05	0.194717	0.0114539
Aldo-keto reductase family 1 member A1	P14550	MR Egger	58	0.04	0.02	1.04081	1.00–1.10	0.0717681	0.00422165	0.20
Aldo-keto reductase family 1 member A1	P14550	Weighted median	58	0.00	0.02	1	0.96–1.02	0.794802	0.0467531
Basement membrane-specific heparan sulfate proteoglycan core protein	P98160	Inverse variance weighted	20	-0.01	0.04	0.99005	0.92–1.02	0.271949	0.015997
Basement membrane-specific heparan sulfate proteoglycan core protein	P98160	MR Egger	20	-0.11	0.05	0.895834	0.81–0.85	0.0609981	0.00358812	0.04
Basement membrane-specific heparan sulfate proteoglycan core protein	P98160	Weighted median	20	-0.04	0.03	0.960789	0.91–0.95	0.229683	0.0135108
Biglycan	P21810	Inverse variance weighted	38	0.03	0.02	1.03045	0.99–1.08	0.154393	0.00908192
Biglycan	P21810	MR Egger	38	0.04	0.03	1.04081	0.98–1.11	0.242668	0.0142746	0.68
Biglycan	P21810	Weighted median	38	0.03	0.03	1.03045	0.97–1.09	0.258868	0.0152275
Cathepsin D	P07339	Inverse variance weighted	17	0.04	0.03	1.04081	0.98–1.11	0.13416	0.00789175
Cathepsin D	P07339	MR Egger	17	0.05	0.04	1.05127	0.97–1.15	0.298436	0.017555	0.83
Cathepsin D	P07339	Weighted median	17	0.06	0.04	1.06184	0.98–1.17	0.100036	0.00588449
Coactosin-like protein	Q14019	Inverse variance weighted	2	0.07	0.08	1.07251	0.92–1.24	0.374404	0.0220238
Cystatin-C	P01034	MR Egger	9	0.03	0.18	1.03045	0.72–1.27	0.860405	0.0506121	0.92
Cystatin-C	P01034	Weighted median	9	0.08	0.07	1.08329	0.94–1.25	0.269181	0.0158342
Cystatin-C	P01034	Inverse variance weighted	9	0.02	0.07	1.0202	0.89–1.12	0.828509	0.0487358
Glucose-6-phosphate isomerase	P06744	Inverse variance weighted	2	-0.11	0.14	0.895834	0.68–0.93	0.442059	0.0260035
Growth/differentiation factor 15	Q99988	Inverse variance weighted	38	0.04	0.02	1.04081	1.00–1.10	0.0447281	0.00263107
Growth/differentiation factor 15	Q99988	MR Egger	38	0.02	0.03	1.0202	0.96–1.07	0.540341	0.0317848	0.49
Growth/differentiation factor 15	Q99988	Weighted median	38	0.04	0.03	1.04081	0.98–1.11	0.198276	0.0116633
Heat shock 70 kDa protein 1A	P0DMV8	MR Egger	7	0.40	0.25	1.49182	0.91–2.81	0.169372	0.00996306	0.13
Heat shock 70 kDa protein 1A	P0DMV8	Weighted median	7	0.10	0.08	1.10517	0.94–1.32	0.231711	0.01363
Heat shock 70 kDa protein 1A	P0DMV8	Inverse variance weighted	7	-0.01	0.12	0.99005	0.78–1.11	0.908753	0.0534561
Heat shock 70 kDa protein 1B	P0DMV9	Inverse variance weighted	5	-0.16	0.12	0.852144	0.67–0.82	0.16978	0.00998707
Heat shock 70 kDa protein 1B	P0DMV9	MR Egger	5	-1.06	0.62	0.346456	0.10–0.23	0.187013	0.0110008	0.24
Heat shock 70 kDa protein 1B	P0DMV9	Weighted median	5	-0.08	0.10	0.923116	0.76–0.94	0.448075	0.0263574
Insulin-like growth factor-binding protein 2	P18065	MR Egger	4	-0.26	0.75	0.771052	0.18–1.27	0.76421	0.0449535	0.85
Insulin-like growth factor-binding protein 2	P18065	Weighted median	4	-0.07	0.11	0.932394	0.75–0.97	0.523601	0.0308001
Insulin-like growth factor-binding protein 2	P18065	Inverse variance weighted	4	-0.10	0.09	0.904837	0.76–0.90	0.27379	0.0161053
Lysosomal Pro-X carboxypeptidase	P42785	MR Egger	30	-0.02	0.04	0.980199	0.91–1.00	0.681365	0.0400803	0.32
Lysosomal Pro-X carboxypeptidase	P42785	Weighted median	30	0.00	0.03	1	0.94–1.03	0.966788	0.0568699
Lysosomal Pro-X carboxypeptidase	P42785	Inverse variance weighted	30	0.02	0.02	1.0202	0.98–1.06	0.463185	0.0272462
Multifunctional procollagen lysine hydroxylase and glycosyltransferase LH3	O60568	MR Egger	21	-0.03	0.07	0.970446	0.85–1.01	0.652227	0.0383663	0.41
Multifunctional procollagen lysine hydroxylase and glycosyltransferase LH3	O60568	Weighted median	21	0	0.05	1	0.91–1.05	0.995248	0.058544
Multifunctional procollagen lysine hydroxylase and glycosyltransferase LH3	O60568	Inverse variance weighted	21	0.01	0.05	1.01005	0.92–1.07	0.775863	0.045639
Peroxiredoxin-1	Q06830	Inverse variance weighted	14	0.01	0.03	1.01005	0.95–1.05	0.63218	0.037187
Peroxiredoxin-1	Q06830	MR Egger	14	0.04	0.04	1.04081	0.96–1.13	0.433221	0.0254836	0.51
Peroxiredoxin-1	Q06830	Weighted median	14	0.04	0.04	1.04081	0.96–1.13	0.382919	0.0225247
Protein S100-A11	P31949	Inverse variance weighted	10	-0.04	0.03	0.960789	0.91–0.95	0.143276	0.00842803
Protein S100-A11	P31949	MR Egger	10	0.00	0.05	1	0.91–1.05	0.943384	0.0554932	0.30
Protein S100-A11	P31949	Weighted median	10	0.00	0.03	1	0.94–1.03	0.994403	0.0584943
Transgelin	Q01995	Inverse variance weighted	3	0.06	0.12	1.06184	0.84–1.27	0.239753	0.0141031
Transgelin	Q01995	MR Egger	3	0.36	0.14	1.43333	1.09–2.33	0.242425	0.0142603	0.25
Transgelin	Q01995	Weighted median	3	0.15	0.09	1.16183	0.97–1.47	0.104183	0.00612844
Tubulin-specific chaperone A	O75347	Inverse variance weighted	71	-0.13	0.03	0.878095	0.83–0.80	6.70715e-05	3.94538e-06		17
Tubulin-specific chaperone A	O75347	MR Egger	71	-0.2	0.06	0.818731	0.73–0.72	0.000803986	4.72933e-05	0.14
Tubulin-specific chaperone A	O75347	Weighted median	71	-0.11	0.02	0.895834	0.86–0.82	6.60361e-06	3.88448e-07

## Sheet: Table B3. leave-one-out
Appendix B3. leave-one-out sensitivity analysis of mendelian randomization results for TBCA (exposure) and dementia (outcome).
SNP	b	SE	p-value
rs10407278	-0.115185	0.0318383	0.000297104
rs10411127	-0.128032	0.0325292	8.28775e-05
rs10418800	-0.129723	0.032382	6.17498e-05
rs10420758	-0.128554	0.0327666	8.73325e-05
rs10423310	-0.122373	0.0329079	0.000200291
rs11083855	-0.126077	0.0323837	9.89205e-05
rs111372221	-0.131112	0.0327731	6.31816e-05
rs112368261	-0.132953	0.0323442	3.94688e-05
rs113255962	-0.126749	0.0325048	9.64333e-05
rs116902363	-0.12337	0.032691	0.000160769
rs116918010	-0.129184	0.0327208	7.87868e-05
rs117326807	-0.127853	0.0324606	8.19217e-05
rs117607126	-0.129229	0.0324759	6.91444e-05
rs117659041	-0.130709	0.0323031	5.20236e-05
rs117725865	-0.129006	0.0324579	7.05073e-05
rs117832976	-0.129151	0.0326109	7.48332e-05
rs117884013	-0.128786	0.0327278	8.31742e-05
rs12971551	-0.12751	0.0325204	8.82088e-05
rs12976252	-0.124686	0.0327553	0.000140895
rs12982684	-0.130278	0.0325436	6.24944e-05
rs138692741	-0.137598	0.0303802	5.92067e-06
rs140776740	-0.128139	0.0324619	7.90209e-05
rs143294854	-0.134543	0.0321575	2.86587e-05
rs143539524	-0.128118	0.0332871	0.000118665
rs143958833	-0.127324	0.0324625	8.77501e-05
rs144351616	-0.128352	0.0330918	0.000105035
rs144665638	-0.134768	0.0326161	3.59703e-05
rs147358043	-0.129086	0.0325071	7.15685e-05
rs147744623	-0.12987	0.0324379	6.23716e-05
rs148258219	-0.126418	0.0326821	0.000109686
rs149929516	-0.124978	0.0317588	8.3121e-05
rs149949562	-0.130668	0.0326662	6.33124e-05
rs150221996	-0.130407	0.0325075	6.03069e-05
rs150418162	-0.129227	0.0324433	6.79999e-05
rs150717440	-0.132502	0.0323193	4.13543e-05
rs174536	-0.131603	0.0324602	5.02865e-05
rs17551297	-0.128852	0.0324841	7.29044e-05
rs17655574	-0.126848	0.0324961	9.48212e-05
rs187053904	-0.132911	0.0320328	3.33632e-05
rs191559098	-0.130311	0.0324532	5.93559e-05
rs192192195	-0.130303	0.032628	6.50771e-05
rs192728214	-0.127833	0.0325541	8.60842e-05
rs2072561	-0.128635	0.0327733	8.6736e-05
rs25476	-0.126943	0.032544	9.59329e-05
rs281377	-0.131308	0.0323531	4.93683e-05
rs2974246	-0.128343	0.032531	7.97113e-05
rs34087272	-0.128878	0.0324817	7.25677e-05
rs34883669	-0.130052	0.0323136	5.70522e-05
rs3786709	-0.129729	0.0324683	6.45401e-05
rs3896477	-0.131261	0.0321507	4.45177e-05
rs3916849	-0.131942	0.0322205	4.22198e-05
rs396118	-0.128334	0.0325481	8.0504e-05
rs542387475	-0.127246	0.0325247	9.14258e-05
rs55886541	-0.12819	0.0325947	8.39426e-05
rs55903102	-0.130026	0.0326841	6.94242e-05
rs56741478	-0.130576	0.0323351	5.38584e-05
rs62117212	-0.123772	0.0324325	0.000135477
rs62117380	-0.12839	0.0325489	7.99638e-05
rs62119458	-0.128671	0.032579	7.83157e-05
rs7245887	-0.0981338	0.02879	0.000652945
rs7252988	-0.129204	0.0325233	7.10756e-05
rs75203827	-0.129652	0.0324847	6.57457e-05
rs75276357	-0.129782	0.0324369	6.30632e-05
rs76003987	-0.129331	0.0324493	6.72985e-05
rs76856627	-0.108944	0.0304913	0.000352966
rs78235771	-0.132524	0.0319573	3.36992e-05
rs79433273	-0.129179	0.0325599	7.26514e-05
rs79789351	-0.12835	0.0324965	7.82593e-05
rs79924756	-0.127356	0.0326479	9.58334e-05
rs80016077	-0.128978	0.0324807	7.15985e-05
rs8110154	-0.128604	0.0327676	8.68262e-05
All	-0.128247	0.0321708	6.70715e-05
Abbreviations: TBCA = Tubulin Folding Cofactor A; SNP = Single Nucleotide Polymorphism; b = beta coefficient (effect estimate); SE = standard error
