# Supplementary material for: Senescence protein signatures predict dementia risk with causal implication for TBCA: a two-cohort study
Source: Research Square preprint supplement (doi:10.21203/rs.3.rs-9131525/v1), 2026-03-26
Supplement: Supplementary file 2 [file 6d19a0529676b4a81b9cc21e.xlsx]

## Sheet: Content
	Sheet name	Description
	Table A1	List of proteins included in midlife SASP score-1
	Table A2	List of proteins included in midlife SASP score-2
	Table A3	List of proteins included in midlife SASP score-3
	Table A4	List of proteins included in late-life SASP score-1
	Table A5	List of proteins included in late-life SASP score-2
	Table A6	List of proteins included in late-life SASP score-3

## Sheet: Table A1. midlife SASPscore-1
Table A1. Proteins (aptamers) included in midlife SASP Score-1 (Number of proteins = 133; number of aptamers = 144)
SeqIDs (aptamer ID)	Uniprot_ID (protein ID)	Uniprot_name (protein name)	Coefficient*
V2SeqId_11428_31	O00151	PDZ and LIM domain protein 1	-0.00312
V2SeqId_5013_2	O00299	Chloride intracellular channel protein 1	0.008568
V2SeqId_15483_377	O00468	Agrin	0.013838
V2SeqId_6923_1	O00469	Procollagen-lysine,2-oxoglutarate 5-dioxygenase 2	-0.06188
V2SeqId_19122_47	O14950	Myosin regulatory light chain 12B	0.017882
V2SeqId_10612_18	O60568	Multifunctional procollagen lysine hydroxylase and glycosyltransferase LH3	0.085474
V2SeqId_12501_10	O75347	Tubulin-specific chaperone A	-0.28732
V2SeqId_15414_316	P00338	L-lactate dehydrogenase A chain	0.008602
V2SeqId_2794_60	P00441	Superoxide dismutase [Cu-Zn]	-0.13094
V2SeqId_5020_50	P00558	Phosphoglycerate kinase 1	0.061606
V2SeqId_4900_8	P01024	Complement C3	0.004842
V2SeqId_2754_50	P01024	Complement C3	-0.00388
V2SeqId_5803_24	P01024	Complement C3	-0.00724
V2SeqId_4480_59	P01024	Complement C3	-0.01173
V2SeqId_2755_8	P01024	Complement C3	-0.01721
V2SeqId_2683_1	P01024	Complement C3	-0.026
V2SeqId_2211_9	P01033	Metalloproteinase inhibitor 1	-0.00503
V2SeqId_2609_59	P01034	Cystatin-C	-0.06967
V2SeqId_15295_81	P01344	Insulin-like growth factor II	0.054819
V2SeqId_3435_53	P02751	Fibronectin	0.017054
V2SeqId_3434_34	P02751	Fibronectin	0.00751
V2SeqId_4131_72	P02751	Fibronectin	-0.01529
V2SeqId_4924_32	P03956	Interstitial collagenase	0.000586
V2SeqId_5864_10	P04075	Fructose-bisphosphate aldolase A	0.087336
V2SeqId_3848_14	P04406	Glyceraldehyde-3-phosphate dehydrogenase	0.032487
V2SeqId_3171_57	P05067	Amyloid-beta precursor protein	-0.00226
V2SeqId_2925_9	P05121	Plasminogen activator inhibitor 1	-0.00088
V2SeqId_4479_14	P05155	Plasma protease C1 inhibitor	0.056079
V2SeqId_4775_34	P06396	Gelsolin	-0.02414
V2SeqId_16607_78	P06396	Gelsolin	-0.1257
V2SeqId_11105_171	P06733	Alpha-enolase	0.000831
V2SeqId_4272_46	P06744	Glucose-6-phosphate isomerase	0.027632
V2SeqId_8870_38	P06748	Nucleophosmin	-0.09257
V2SeqId_3890_8	P07195	L-lactate dehydrogenase B chain	0.038495
V2SeqId_4278_14	P07237	Protein disulfide-isomerase	-0.05874
V2SeqId_5508_62	P07339	Cathepsin D	0.052354
V2SeqId_6207_10	P07602	Prosaposin	-0.19974
V2SeqId_15470_11	P07686	Beta-hexosaminidase subunit beta	0.017885
V2SeqId_8007_19	P07858	Cathepsin B	0.006742
V2SeqId_2625_53	P07900	Heat shock protein HSP 90-alpha	0.031064
V2SeqId_4472_5	P07951	Tropomyosin beta chain	-0.0027
V2SeqId_3474_19	P07996	Thrombospondin-1	-0.0338
V2SeqId_5467_15	P08238	Heat shock protein HSP 90-beta	0.023409
V2SeqId_4160_49	P08253	72 kDa type IV collagenase	-0.10405
V2SeqId_15540_6	P08670	Vimentin	-0.06721
V2SeqId_4911_49	P09211	Glutathione S-transferase P	-0.01627
V2SeqId_2985_35	P09341	Growth-regulated alpha protein	0.024408
V2SeqId_8046_9	P09382	Galectin-1	0.086521
V2SeqId_2524_56	P09429	High mobility group protein B1	-0.01157
V2SeqId_8840_61	P09871	Complement C1s subcomponent	-0.04721
V2SeqId_5019_16	P09936	Ubiquitin carboxyl-terminal hydrolase isozyme L1	-0.01501
V2SeqId_9876_20	P09972	Fructose-bisphosphate aldolase C	-0.00937
V2SeqId_4124_24	P0DMV8	Heat shock 70 kDa protein 1A	0.033678
V2SeqId_18901_26	P0DMV9	Heat shock 70 kDa protein 1B	0.087594
V2SeqId_16588_10	P11021	Endoplasmic reticulum chaperone BiP	0.031404
V2SeqId_5903_91	P11142	Heat shock cognate 71 kDa protein	0.073188
V2SeqId_16828_8	P12109	Collagen alpha-1(VI) chain	0.005027
V2SeqId_16753_46	P12110	Collagen alpha-2(VI) chain	0.109539
V2SeqId_11196_31	P12111	Collagen alpha-3(VI) chain	-0.01748
V2SeqId_9843_5	P12814	Alpha-actinin-1	-6.03e-05
V2SeqId_9561_21	P13611	Versican core protein	-0.05523
V2SeqId_16616_137	P13929	Beta-enolase	-0.03962
V2SeqId_8221_19	P14174	Macrophage migration inhibitory factor	0.025071
V2SeqId_5687_5	P14314	Glucosidase 2 subunit beta	-0.0146
V2SeqId_4192_10	P14550	Aldo-keto reductase family 1 member A1	0.036003
V2SeqId_4240_31	P14618	Pyruvate kinase PKM	0.008213
V2SeqId_6393_63	P14625	Endoplasmin	-0.00044
V2SeqId_16606_85	P15121	Aldo-keto reductase family 1 member B1	-0.01872
V2SeqId_9753_17	P15311	Ezrin	0.008143
V2SeqId_2278_61	P16035	Metalloproteinase inhibitor 2	-0.0121
V2SeqId_9283_8	P16070	CD44 antigen	0.012292
V2SeqId_16536_3	P17096	High mobility group protein HMG-I/HMG-Y	0.034371
V2SeqId_2571_12	P17936	Insulin-like growth factor-binding protein 3	0.017886
V2SeqId_8469_41	P18065	Insulin-like growth factor-binding protein 2	0.05418
V2SeqId_8750_46	P18206	Vinculin	-0.0121
V2SeqId_3896_5	P18669	Phosphoglycerate mutase 1	-0.00804
V2SeqId_19373_3	P19105	Myosin regulatory light chain 12A	0.00534
V2SeqId_11171_25	P21333	Filamin-A	0.00048
V2SeqId_3284_75	P21810	Biglycan	0.055428
V2SeqId_4249_64	P22392	Nucleoside diphosphate kinase B	0.002804
V2SeqId_5351_52	P22626	Heterogeneous nuclear ribonucleoproteins A2/B1	0.057908
V2SeqId_2950_57	P22692	Insulin-like growth factor-binding protein 4	0.032985
V2SeqId_4718_5	P23284	Peptidyl-prolyl cis-trans isomerase B	0.056323
V2SeqId_19581_15	P24593	Insulin-like growth factor-binding protein 5	-0.05379
V2SeqId_4155_3	P24821	Tenascin	0.047868
V2SeqId_18926_7	P25788	Proteasome subunit alpha type-3	-0.0767
V2SeqId_6447_73	P26022	Pentraxin-related protein PTX3	0.023072
V2SeqId_5009_11	P26038	Moesin	0.032727
V2SeqId_7625_27	P27348	14-3-3 protein theta	0.041303
V2SeqId_5264_65	P27797	Calreticulin	-0.00723
V2SeqId_10530_8	P28072	Proteasome subunit beta type-6	0.010666
V2SeqId_4306_4	P29401	Transketolase	0.011069
V2SeqId_5018_68	P30041	Peroxiredoxin-6	0.033405
V2SeqId_4276_10	P30086	Phosphatidylethanolamine-binding protein 1	0.013973
V2SeqId_4719_58	P30101	Protein disulfide-isomerase A3	-0.0883
V2SeqId_14156_33	P31946	14-3-3 protein beta/alpha	-0.00196
V2SeqId_14011_17	P31949	Protein S100-A11	0.105101
V2SeqId_9201_13	P37802	Transgelin-2	-0.01723
V2SeqId_11636_33	P37802	Transgelin-2	-0.02946
V2SeqId_11347_9	P37837	Transaldolase	0.065375
V2SeqId_3853_56	P40925	Malate dehydrogenase, cytoplasmic	0.042828
V2SeqId_15534_26	P40926	Malate dehydrogenase, mitochondrial	-0.00659
V2SeqId_5722_78	P42785	Lysosomal Pro-X carboxypeptidase	0.089215
V2SeqId_12340_17	P49588	Alanine--tRNA ligase, cytoplasmic	-0.01882
V2SeqId_2647_66	P50395	Rab GDP dissociation inhibitor beta	0.040214
V2SeqId_10800_15	P50454	Serpin H1	0.056338
V2SeqId_6454_38	P52565	Rho GDP-dissociation inhibitor 1	-0.10509
V2SeqId_4930_21	P52823	Stanniocalcin-1	0.006377
V2SeqId_4309_59	P60174	Triosephosphate isomerase	0.004099
V2SeqId_18829_4	P60842	Eukaryotic initiation factor 4A-I	-0.01982
V2SeqId_17150_8	P61604	10 kDa heat shock protein, mitochondrial	0.000509
V2SeqId_14157_21	P62258	14-3-3 protein epsilon	0.088979
V2SeqId_3844_2	P62937	Peptidyl-prolyl cis-trans isomerase A	-0.02253
V2SeqId_5858_6	P63104	14-3-3 protein zeta/delta	0.000427
V2SeqId_12436_84	P78417	Glutathione S-transferase omega-1	-0.00211
V2SeqId_15626_223	P98160	Basement membrane-specific heparan sulfate proteoglycan core protein	0.15059
V2SeqId_15640_54	Q01995	Transgelin	0.066767
V2SeqId_10451_11	Q02818	Nucleobindin-1	0.097818
V2SeqId_9883_29	Q04760	Lactoylglutathione lyase	0.00656
V2SeqId_5918_5	Q06323	Proteasome activator complex subunit 1	-0.06397
V2SeqId_3855_56	Q06830	Peroxiredoxin-1	0.010597
V2SeqId_5000_52	Q08380	Galectin-3-binding protein	0.008809
V2SeqId_5451_1	Q13740	CD166 antigen	-0.06004
V2SeqId_4905_63	Q14019	Coactosin-like protein	-0.06829
V2SeqId_16060_99	Q14112	Nidogen-2	0.024493
V2SeqId_3457_57	Q15063	Periostin	0.093829
V2SeqId_3283_21	Q15582	Transforming growth factor-beta-induced protein ig-h3	-0.04926
V2SeqId_3320_49	Q16270	Insulin-like growth factor-binding protein 7	0.077819
V2SeqId_13567_1	Q16555	Dihydropyrimidinase-related protein 2	-0.00944
V2SeqId_3366_51	Q16610	Extracellular matrix protein 1	0.071029
V2SeqId_13967_14	Q16881	Thioredoxin reductase 1, cytoplasmic	0.020847
V2SeqId_5682_13	Q6EMK4	Vasorin	-0.15608
V2SeqId_13463_1	Q92626	Peroxidasin homolog	-0.00224
V2SeqId_9248_36	Q969H8	Myeloid-derived growth factor	-0.04771
V2SeqId_15467_10	Q96CG8	Collagen triple helix repeat-containing protein 1	-0.08582
V2SeqId_19545_145	Q99497	Protein/nucleic acid deglycase DJ-1	0.051715
V2SeqId_19523_215	Q99497	Protein/nucleic acid deglycase DJ-1	-0.00394
V2SeqId_4374_45	Q99988	Growth/differentiation factor 15	0.139973
V2SeqId_17490_4	Q9H299	SH3 domain-binding glutamic acid-rich-like protein 3	-0.02785
V2SeqId_3041_55	Q9UBG0	C-type mannose receptor 2	0.034979
V2SeqId_4971_1	Q9UBR2	Cathepsin Z	0.013178
V2SeqId_4500_50	Q9Y240	C-type lectin domain family 11 member A	-0.01335
V2SeqId_2966_65	Q9Y240	C-type lectin domain family 11 member A	-0.01638
V2SeqId_6504_65	Q9Y4K0	Lysyl oxidase homolog 2	-0.02381
Note: Results from Cox ridge regression including all 133 proteins as predictors and incident dementia as the outcome, adjusted for chronological age, gender, joint terms for race and study center, education, BMI, smoking status, diabetes, hypertension, total cholesterol level, and eGFR. Proteins were selected based on a p-value threshold of < 0.05.

## Sheet: Table A2. midlife SASPscore-2
Table A2. Proteins (aptamers) included in midlife SASP Score-2 (Number of proteins = 16; number of aptamers = 16)
SeqIDs (aptamer ID)	Uniprot_ID (protein ID)	Uniprot_name (protein name)	Coefficient*	FDR _adjusted_p-value
V2SeqId_10612_18	O60568	Multifunctional procollagen lysine hydroxylase and glycosyltransferase LH3	0.337244	0.006061
V2SeqId_12501_10	O75347	Tubulin-specific chaperone A	-0.47095	3.73e-22
V2SeqId_4272_46	P06744	Glucose-6-phosphate isomerase	0.194212	0.008033
V2SeqId_5508_62	P07339	Cathepsin D	0.201997	0.008033
V2SeqId_4124_24	P0DMV8	Heat shock 70 kDa protein 1A	0.420926	0.005624
V2SeqId_18901_26	P0DMV9	Heat shock 70 kDa protein 1B	0.406879	4.3e-05
V2SeqId_5903_91	P11142	Heat shock cognate 71 kDa protein	0.277272	0.003591
V2SeqId_4192_10	P14550	Aldo-keto reductase family 1 member A1	0.249904	0.012842
V2SeqId_3284_75	P21810	Biglycan	0.291793	0.012842
V2SeqId_14011_17	P31949	Protein S100-A11	0.273154	0.008033
V2SeqId_5722_78	P42785	Lysosomal Pro-X carboxypeptidase	0.224767	0.024452
V2SeqId_14157_21	P62258	14-3-3 protein epsilon	0.348556	0.015776
V2SeqId_3855_56	Q06830	Peroxiredoxin-1	0.195229	0.017835
V2SeqId_4905_63	Q14019	Coactosin-like protein	-0.40648	0.014027
V2SeqId_13967_14	Q16881	Thioredoxin reductase 1, cytoplasmic	0.256112	0.014027
V2SeqId_4374_45	Q99988	Growth/differentiation factor 15	0.435616	5.92e-09
Note: Results from multivariable Cox regression models, each including one protein as a predictor and incident dementia as the outcome at a time. Models were adjusted for chronological age, gender, joint terms for race and study center, education, BMI, smoking status, diabetes, hypertension, total cholesterol level, and eGFR. Proteins were selected based on an FDR-adjusted p-value < 0.05.

## Sheet: Table A3. midlife SASPscore-3
Table A3. Proteins (aptamers) included in midlife SASP Score-3 (Number of proteins = 2; number of aptamers = 3)
SeqIDs (aptamer ID)	Uniprot_ID (protein ID)	Uniprot_name (protein name)	coef*	p-value
V2SeqId_19622_7	P08476	Inhibin beta A chain	-0.243143	0.019084
V2SeqId_13738_8	P08476	Inhibin beta A chain	0.275495	0.00625436
V2SeqId_4374_45	Q99988	Growth/differentiation factor 15	0.426971	4.16537e-10
Note: Results from multivariable Cox regression models including all two dementia-associated proteins as predictors and incident dementia as the outcome. The two proteins (three aptamers) were selected based on a p-value < 0.2 from multivariable Cox regression models that included all seven proteins (GDF15, FAS, OPN, TNFR1, ACTIVIN A, CCL3, IL-15) validated in Schafer’s study as predictors and in…

## Sheet: Table A4. late-life SASPscore-1
Table A4. Proteins (aptamers) included in late-life SASP Score-1 (Number of proteins = 133; number of aptamers = 144)
SeqIDs (aptamer ID)	Uniprot_ID (protein ID)	Uniprot_name (protein name)	Coefficient
V5SeqId_11428_31	O00151	PDZ and LIM domain protein 1	0.006066
V5SeqId_5013_2	O00299	Chloride intracellular channel protein 1	-0.01859
V5SeqId_15483_377	O00468	Agrin	-0.03351
V5SeqId_6923_1	O00469	Procollagen-lysine,2-oxoglutarate 5-dioxygese 2	-0.09008
V5SeqId_19122_47	O14950	Myosin regulatory light chain 12B	-0.00966
V5SeqId_10612_18	O60568	Multifunctiol procollagen lysine hydroxylase and glycosyltransferase LH3	0.011695
V5SeqId_12501_10	O75347	Tubulin-specific chaperone A	-0.11196
V5SeqId_15414_316	P00338	L-lactate dehydrogese A chain	-0.04798
V5SeqId_2794_60	P00441	Superoxide dismutase [Cu-Zn]	0.062454
V5SeqId_5020_50	P00558	Phosphoglycerate kise 1	0.064796
V5SeqId_4900_8	P01024	Complement C3	-0.01916
V5SeqId_4480_59	P01024	Complement C3	0.008611
V5SeqId_2754_50	P01024	Complement C3	0.034823
V5SeqId_2683_1	P01024	Complement C3	0.056018
V5SeqId_2755_8	P01024	Complement C3	0.074108
V5SeqId_5803_24	P01024	Complement C3	0.084671
V5SeqId_2211_9	P01033	Metalloproteise inhibitor 1	-0.02234
V5SeqId_2609_59	P01034	Cystatin-C	0.09457
V5SeqId_15295_81	P01344	Insulin-like growth factor II	-0.00782
V5SeqId_4131_72	P02751	Fibronectin	-0.04635
V5SeqId_3435_53	P02751	Fibronectin	0.009652
V5SeqId_3434_34	P02751	Fibronectin	0.045089
V5SeqId_4924_32	P03956	Interstitial collagese	0.005518
V5SeqId_5864_10	P04075	Fructose-bisphosphate aldolase A	0.049904
V5SeqId_3848_14	P04406	Glyceraldehyde-3-phosphate dehydrogese	-0.00637
V5SeqId_3171_57	P05067	Amyloid-beta precursor protein	0.030953
V5SeqId_2925_9	P05121	Plasminogen activator inhibitor 1	-0.06157
V5SeqId_4479_14	P05155	Plasma protease C1 inhibitor	0.080941
V5SeqId_16607_78	P06396	Gelsolin	-0.15964
V5SeqId_4775_34	P06396	Gelsolin	-0.05676
V5SeqId_11105_171	P06733	Alpha-enolase	0.001885
V5SeqId_4272_46	P06744	Glucose-6-phosphate isomerase	0.00268
V5SeqId_8870_38	P06748	Nucleophosmin	-0.05419
V5SeqId_3890_8	P07195	L-lactate dehydrogese B chain	-0.03122
V5SeqId_4278_14	P07237	Protein disulfide-isomerase	-0.1038
V5SeqId_5508_62	P07339	Cathepsin D	0.102679
V5SeqId_6207_10	P07602	Prosaposin	-0.0607
V5SeqId_15470_11	P07686	Beta-hexosaminidase subunit beta	-0.01222
V5SeqId_8007_19	P07858	Cathepsin B	0.052984
V5SeqId_2625_53	P07900	Heat shock protein HSP 90-alpha	0.016813
V5SeqId_4472_5	P07951	Tropomyosin beta chain	-0.01291
V5SeqId_3474_19	P07996	Thrombospondin-1	0.042615
V5SeqId_5467_15	P08238	Heat shock protein HSP 90-beta	0.040401
V5SeqId_4160_49	P08253	72 kDa type IV collagese	0.068261
V5SeqId_15540_6	P08670	Vimentin	-0.00571
V5SeqId_4911_49	P09211	Glutathione S-transferase P	-0.00221
V5SeqId_2985_35	P09341	Growth-regulated alpha protein	0.015758
V5SeqId_8046_9	P09382	Galectin-1	0.010566
V5SeqId_2524_56	P09429	High mobility group protein B1	-0.02048
V5SeqId_8840_61	P09871	Complement C1s subcomponent	0.040834
V5SeqId_5019_16	P09936	Ubiquitin carboxyl-termil hydrolase isozyme L1	-0.01635
V5SeqId_9876_20	P09972	Fructose-bisphosphate aldolase C	0.061578
V5SeqId_4124_24	P0DMV8	Heat shock 70 kDa protein 1A	0.107693
V5SeqId_18901_26	P0DMV9	Heat shock 70 kDa protein 1B	0.054831
V5SeqId_16588_10	P11021	Endoplasmic reticulum chaperone BiP	0.007233
V5SeqId_5903_91	P11142	Heat shock cogte 71 kDa protein	-0.00984
V5SeqId_16828_8	P12109	Collagen alpha-1(VI) chain	-0.01402
V5SeqId_16753_46	P12110	Collagen alpha-2(VI) chain	0.092151
V5SeqId_11196_31	P12111	Collagen alpha-3(VI) chain	0.033572
V5SeqId_9843_5	P12814	Alpha-actinin-1	-0.01121
V5SeqId_9561_21	P13611	Versican core protein	0.036578
V5SeqId_16616_137	P13929	Beta-enolase	-0.03706
V5SeqId_8221_19	P14174	Macrophage migration inhibitory factor	0.000268
V5SeqId_5687_5	P14314	Glucosidase 2 subunit beta	-0.08672
V5SeqId_4192_10	P14550	Aldo-keto reductase family 1 member A1	-0.04993
V5SeqId_4240_31	P14618	Pyruvate kise PKM	0.000264
V5SeqId_6393_63	P14625	Endoplasmin	0.048859
V5SeqId_16606_85	P15121	Aldo-keto reductase family 1 member B1	-0.00161
V5SeqId_9753_17	P15311	Ezrin	0.008557
V5SeqId_2278_61	P16035	Metalloproteise inhibitor 2	0.027763
V5SeqId_9283_8	P16070	CD44 antigen	-0.05029
V5SeqId_16536_3	P17096	High mobility group protein HMG-I/HMG-Y	0.076894
V5SeqId_2571_12	P17936	Insulin-like growth factor-binding protein 3	0.032886
V5SeqId_8469_41	P18065	Insulin-like growth factor-binding protein 2	0.085001
V5SeqId_8750_46	P18206	Vinculin	-0.01988
V5SeqId_3896_5	P18669	Phosphoglycerate mutase 1	0.029136
V5SeqId_19373_3	P19105	Myosin regulatory light chain 12A	0.005374
V5SeqId_11171_25	P21333	Filamin-A	-0.02094
V5SeqId_3284_75	P21810	Biglycan	-0.0142
V5SeqId_4249_64	P22392	Nucleoside diphosphate kise B	-0.00027
V5SeqId_5351_52	P22626	Heterogeneous nuclear ribonucleoproteins A2/B1	-0.0126
V5SeqId_2950_57	P22692	Insulin-like growth factor-binding protein 4	0.051284
V5SeqId_4718_5	P23284	Peptidyl-prolyl cis-trans isomerase B	0.005741
V5SeqId_19581_15	P24593	Insulin-like growth factor-binding protein 5	-0.02936
V5SeqId_4155_3	P24821	Tescin	0.010857
V5SeqId_18926_7	P25788	Proteasome subunit alpha type-3	0.014318
V5SeqId_6447_73	P26022	Pentraxin-related protein PTX3	-0.05285
V5SeqId_5009_11	P26038	Moesin	-0.01364
V5SeqId_7625_27	P27348	14-3-3 protein theta	0.05978
V5SeqId_5264_65	P27797	Calreticulin	-0.01779
V5SeqId_10530_8	P28072	Proteasome subunit beta type-6	0.075807
V5SeqId_4306_4	P29401	Transketolase	-0.00028
V5SeqId_5018_68	P30041	Peroxiredoxin-6	0.02489
V5SeqId_4276_10	P30086	Phosphatidylethanolamine-binding protein 1	-0.00388
V5SeqId_4719_58	P30101	Protein disulfide-isomerase A3	0.011425
V5SeqId_14156_33	P31946	14-3-3 protein beta/alpha	0.011496
V5SeqId_14011_17	P31949	Protein S100-A11	0.073503
V5SeqId_9201_13	P37802	Transgelin-2	-0.00531
V5SeqId_11636_33	P37802	Transgelin-2	0.00094
V5SeqId_11347_9	P37837	Transaldolase	0.086611
V5SeqId_3853_56	P40925	Malate dehydrogese, cytoplasmic	0.007059
V5SeqId_15534_26	P40926	Malate dehydrogese, mitochondrial	-0.02167
V5SeqId_5722_78	P42785	Lysosomal Pro-X carboxypeptidase	-0.02254
V5SeqId_12340_17	P49588	Alanine--tR ligase, cytoplasmic	0.020898
V5SeqId_2647_66	P50395	Rab GDP dissociation inhibitor beta	-0.03245
V5SeqId_10800_15	P50454	Serpin H1	0.029805
V5SeqId_6454_38	P52565	Rho GDP-dissociation inhibitor 1	-0.02743
V5SeqId_4930_21	P52823	Stanniocalcin-1	0.044151
V5SeqId_4309_59	P60174	Triosephosphate isomerase	-0.00264
V5SeqId_18829_4	P60842	Eukaryotic initiation factor 4A-I	0.013983
V5SeqId_17150_8	P61604	10 kDa heat shock protein, mitochondrial	0.011672
V5SeqId_14157_21	P62258	14-3-3 protein epsilon	0.153671
V5SeqId_3844_2	P62937	Peptidyl-prolyl cis-trans isomerase A	0.025065
V5SeqId_5858_6	P63104	14-3-3 protein zeta/delta	0.00795
V5SeqId_12436_84	P78417	Glutathione S-transferase omega-1	-0.04576
V5SeqId_15626_223	P98160	Basement membrane-specific heparan sulfate proteoglycan core protein	0.169941
V5SeqId_15640_54	Q01995	Transgelin	0.126939
V5SeqId_10451_11	Q02818	Nucleobindin-1	0.042678
V5SeqId_9883_29	Q04760	Lactoylglutathione lyase	0.026282
V5SeqId_5918_5	Q06323	Proteasome activator complex subunit 1	-0.06348
V5SeqId_3855_56	Q06830	Peroxiredoxin-1	0.001719
V5SeqId_5000_52	Q08380	Galectin-3-binding protein	-0.02233
V5SeqId_5451_1	Q13740	CD166 antigen	0.011497
V5SeqId_4905_63	Q14019	Coactosin-like protein	-0.08612
V5SeqId_16060_99	Q14112	Nidogen-2	0.03216
V5SeqId_3457_57	Q15063	Periostin	0.092956
V5SeqId_3283_21	Q15582	Transforming growth factor-beta-induced protein ig-h3	-0.1372
V5SeqId_3320_49	Q16270	Insulin-like growth factor-binding protein 7	0.173905
V5SeqId_13567_1	Q16555	Dihydropyrimidise-related protein 2	0.009123
V5SeqId_3366_51	Q16610	Extracellular matrix protein 1	0.167596
V5SeqId_13967_14	Q16881	Thioredoxin reductase 1, cytoplasmic	-0.07213
V5SeqId_5682_13	Q6EMK4	Vasorin	-0.0873
V5SeqId_13463_1	Q92626	Peroxidasin homolog	0.008163
V5SeqId_9248_36	Q969H8	Myeloid-derived growth factor	-0.03407
V5SeqId_15467_10	Q96CG8	Collagen triple helix repeat-containing protein 1	-0.07333
V5SeqId_19545_145	Q99497	Protein/nucleic acid deglycase DJ-1	0.020777
V5SeqId_19523_215	Q99497	Protein/nucleic acid deglycase DJ-1	0.027441
V5SeqId_4374_45	Q99988	Growth/differentiation factor 15	0.071947
V5SeqId_17490_4	Q9H299	SH3 domain-binding glutamic acid-rich-like protein 3	-0.00273
V5SeqId_3041_55	Q9UBG0	C-type mannose receptor 2	-0.0249
V5SeqId_4971_1	Q9UBR2	Cathepsin Z	-0.09478
V5SeqId_4500_50	Q9Y240	C-type lectin domain family 11 member A	0.038002
V5SeqId_2966_65	Q9Y240	C-type lectin domain family 11 member A	0.045352
V5SeqId_6504_65	Q9Y4K0	Lysyl oxidase homolog 2	0.012606
Note: Results from Cox Ridge Regression adjusted for adjusted for chronological age, gender, joint terms for race and study center, education, BMI, smoking status, diabetes, hypertension, total cholesterol level, and eGFR. Proteins were selected based on p-value <0.05.

## Sheet: Table A5. late-life SASPscore-2
Table A5. Proteins (aptamers) included in late-life SASP Score-2 (Number of proteins = 6; number of aptamers = 6)
SeqIDs (aptamer ID)	Uniprot_ID (protein ID)	Uniprot_name (protein name)	Coefficient	FDR _adjusted_p-value
V5SeqId_2609_59	P01034	Cystatin-C	0.977699	0.015033
V5SeqId_8469_41	P18065	Insulin-like growth factor-binding protein 2	0.425037	0.000685
V5SeqId_14157_21	P62258	14-3-3 protein epsilon	0.577222	0.02257
V5SeqId_15626_223	P98160	Basement membrane-specific heparan sulfate proteoglycan core protein	0.596041	0.015033
V5SeqId_15640_54	Q01995	Transgelin	0.664784	0.000686
V5SeqId_4374_45	Q99988	Growth/differentiation factor 15	0.365378	0.024101
Note: Results from multivariable Cox regression models, each including one protein as a predictor and incident dementia as the outcome at a time. Models were adjusted for chronological age, gender, joint terms for race and study center, education, BMI, smoking status, diabetes, hypertension, total cholesterol level, and eGFR. Proteins were selected based on an FDR-adjusted p-value < 0.05.

## Sheet: Table A6. late-life SASPscore-3
Table A6. Proteins (aptamers) included in late-life SASP Score-3 (Number of proteins = 4; number of aptamers = 5)
SeqIDs (aptamer ID)	Uniprot_ID (protein ID)	Uniprot_name (protein name)	Coefficient	p-value
V5SeqId_13738_8	P08476	Inhibin beta A chain	0.270917	0.188834
V5SeqId_19622_7	P08476	Inhibin beta A chain	-0.462706	0.0324912
V5SeqId_13113_7	P10451	Osteopontin	0.211399	0.0350711
V5SeqId_2654_19	P19438	Tumor necrosis factor receptor superfamily member 1A	0.219812	0.316094
V5SeqId_4374_45	Q99988	Growth/differentiation factor 15	0.281994	0.0259332
Note: Results from multivariable Cox regression models including all four dementia-associated proteins as predictors and incident dementia as the outcome. The four proteins (five aptamers) were selected based on a p-value < 0.2 from multivariable Cox regression models that included all seven proteins (GDF15, FAS, OPN, TNFR1, ACTIVIN A, CCL3, IL-15) validated in Schafer’s study as predictors and i…
